# Supplementary material for: Characteristic gene expression profiles in the progression from liver cirrhosis to carcinoma induced by diethylnitrosamine in a rat model
Source: PubMed Central journal article supplement (PMC2729293; doi:10.1186/1756-9966-28-107), 2009-07-29
Supplement: 1756-9966-28-107-S1.pdf [file 1756-9966-28-107-S1.pdf]

**Table 1 The list of deregulated DEGs sharing from cirrhosis to metastasis stage compared with control.**

| Probe Set Id | Gene Title                                                                | Gene Symbol | Log <sub>2</sub> ratio |     |     |     |
|--------------|---------------------------------------------------------------------------|-------------|------------------------|-----|-----|-----|
|              |                                                                           |             | 12w                    | 14w | 16w | 20w |
| 1367811_At   | 3-Phosphoglycerate Dehydrogenase                                          | Phgdh       | 5.3                    | 5.1 | 5.7 | 6.6 |
| 1376226_At   | Acetyl-Coenzyme A Acetyltransferase 2                                     | Acat2       | 1                      | 1.9 | 1.1 | 1.2 |
| 1367942_At   | Acid Phosphatase 5, Tartrate Resistant                                    | Acp5        | 1.7                    | 2   | 1.9 | 2.3 |
| 1371327_A_At | Actin, Gamma, Cytoplasmic 1                                               | Actg1       | 1                      | 1.1 | 1.1 | 1.6 |
| 1368342_At   | Adenosine Monophosphate Deaminase 3                                       | Ampd3       | 3.4                    | 4.3 | 5.2 | 5.4 |
| 1371703_At   | Ahnak Nucleoprotein (Desmoyokin)                                          | Ahnak       | 1.7                    | 1.9 | 2.3 | 2.4 |
| 1368130_At   | Aldehyde Dehydrogenase Family 3,<br>Member A1                             | Aldh3a1     | 3.7                    | 3   | 4.5 | 2.7 |
| 1367734_At   | Aldo-Keto Reductase Family 1, Member B4<br>(Aldose Reductase)             | Akr1b4      | 2                      | 1.9 | 2.6 | 1.9 |
| 1368569_At   | Aldo-Keto Reductase Family 1, Member B7                                   | Akr1b7      | 3.3                    | 2.9 | 2   | 3.4 |
| 1370902_At   | Aldo-Keto Reductase Family 1, Member B8                                   | Akr1b8      | 8.8                    | 8.9 | 8.7 | 8.5 |
| 1368121_At   | Aldo-Keto Reductase Family 7, Member<br>A3 (Aflatoxin Aldehyde Reductase) | Akr7a3      | 2.1                    | 2   | 1.9 | 1.4 |
| 1367617_At   | Aldolase A                                                                | Aldoa       | 1.3                    | 1.8 | 1.7 | 2.3 |
| 1368413_At   | Amiloride Binding Protein 1 (Amine<br>Oxidase, Copper-Containing)         | Abp1        | 2.5                    | 3.2 | 1.9 | 2.6 |
| 1371571_At   | Amyloid Beta (A4) Precursor Protein                                       | App         | 1.6                    | 1.7 | 1.7 | 1   |

|              |                                                              |          |     |     |     |     |
|--------------|--------------------------------------------------------------|----------|-----|-----|-----|-----|
| 1367614_At   | Annexin A1                                                   | Anxa1    | 2.9 | 3.1 | 3.9 | 3.5 |
| 1367584_At   | Annexin A2                                                   | Anxa2    | 3.6 | 3.2 | 3.7 | 4.2 |
| 1367974_At   | Annexin A3                                                   | Anxa3    | 1.3 | 1.5 | 1.5 | 1.5 |
| 1386862_At   | Annexin A5                                                   | Anxa5    | 2.9 | 3.3 | 2.7 | 2.9 |
| 1368143_At   | Annexin A7                                                   | Anxa7    | 2.5 | 3   | 3   | 2.8 |
| 1388440_At   | Anterior Pharynx Defective 1b Homolog                        | Aph1b    | 1.4 | 1.6 | 1.2 | 1.2 |
| 1369625_At   | Aquaporin 1                                                  | Aqp1     | 2.1 | 1.9 | 1.7 | 3.7 |
| 1368317_At   | Aquaporin 7                                                  | Aqp7     | 1.1 | 1.3 | 1.1 | 1.5 |
| 1387925_At   | Asparagine Synthetase                                        | Asns     | 2   | 2.2 | 2.6 | 2.5 |
| 1369588_A_At | Atpase Inhibitory Factor 1                                   | Atpif1   | 2.5 | 2.6 | 2.5 | 2   |
|              | Atpase, H <sup>+</sup> Transporting, V0 Subunit E            |          |     |     |     |     |
| 1372907_At   | Isoform 2                                                    | Atp6v0e2 | 1   | 1.2 | 1   | 1.1 |
|              | Atpase, Na <sup>+</sup> /K <sup>+</sup> Transporting, Beta 1 |          |     |     |     |     |
| 1367814_At   | Polypeptide                                                  | Atp1b1   | 1   | 1.1 | 1   | 1.8 |
|              | Atp-Binding Cassette, Sub-Family B                           |          |     |     |     |     |
| 1370583_S_At | (Mdr/Tap), Member 1b                                         | Abcb1a   | 2.9 | 2.9 | 2.5 | 2   |
|              | Atp-Binding Cassette, Sub-Family C                           |          |     |     |     |     |
| 1369698_At   | (Cftr/Mrp), Member 3                                         | Abcc3    | 4.5 | 4.8 | 5.3 | 4.8 |
|              | B-Cell Translocation Gene 2,                                 |          |     |     |     |     |
| 1386995_At   | Anti-Proliferative                                           | Btg2     | 1.8 | 1.6 | 2.1 | 4.7 |
| 1370249_At   | Benzodiazepine Receptor, Peripheral                          | Bzrp     | 2.2 | 2.7 | 2.6 | 2.7 |
| 1398350_At   | Brain Abundant, Membrane Attached                            | Basp1    | 2.1 | 2.4 | 2.2 | 2   |

| Signal Protein 1                        |                                  |           |     |     |     |     |  |
|-----------------------------------------|----------------------------------|-----------|-----|-----|-----|-----|--|
| 1388802_At                              | Brain Expressed X-Linked 1       | Bex1      | 8.2 | 8.6 | 9.2 | 7   |  |
| 1373458_At                              | Brain Expressed X-Linked 4       | Bex4      | 2.7 | 2.8 | 1.7 | 2.8 |  |
| Candidate Mediator Of The P53-Dependent |                                  |           |     |     |     |     |  |
| 1390672_At                              | G2 Arrest                        | Rprm      | 4.7 | 4.3 | 3.9 | 4.1 |  |
| 1386922_At                              | Carbonic Anhydrase 2             | Ca2       | 4.4 | 4.1 | 4.5 | 3.4 |  |
| 1368037_At                              | Carbonyl Reductase 1             | Cbr1      | 1.9 | 2.3 | 1.6 | 2.3 |  |
| 1369657_At                              | Carboxypeptidase A1              | Cpa1      | 2.4 | 2.2 | 2.2 | 4.1 |  |
| 1368167_At                              | Cathepsin E                      | Ctse      | 3.1 | 3.3 | 3.5 | 2.7 |  |
| 1369953_A_At                            | Cd24 Antigen                     | Cd24      | 4.6 | 4.6 | 4.5 | 4.8 |  |
| 1374198_At                              | Cd276 Antigen                    | Cd276     | 1.2 | 1   | 1.4 | 1.4 |  |
| 1367689_A_At                            | Cd36 Antigen                     | Cd36      | 1   | 1.6 | 2   | 1.1 |  |
| 1387952_A_At                            | Cd44 Antigen                     | Cd44      | 2.9 | 3.9 | 3.8 | 2.4 |  |
| 1367679_At                              | Cd74 Antigen                     | Cd74      | 2.8 | 2.8 | 2.8 | 2.8 |  |
| 1367776_At                              | Cell Division Cycle 2 Homolog A  | Cdc2a     | 3   | 2.4 | 2.8 | 2.7 |  |
| 1370294_A_At                            | Cell Division Cycle 20 Homolo    | Cdc20     | 2   | 1.4 | 1.3 | 1.6 |  |
| 1374557_At                              | Cg6210-Like                      | Loc362065 | 1.2 | 1.7 | 2.1 | 1.8 |  |
| Chemokine (C-C Motif) Ligand 21b        |                                  |           |     |     |     |     |  |
| 1378015_At                              | (Serine)                         | Ccl21b    | 3.6 | 4   | 3.2 | 4.3 |  |
| 1381993_At                              | Chloride Intracellular Channel 2 | Clic2     | 1.7 | 1.7 | 1.8 | 1.6 |  |
| Chromobox Homolog 3 (Hp1 Gamma          |                                  |           |     |     |     |     |  |
| 1371395_At                              | Homolog, Drosophila)             | Cbx3      | 1.1 | 1   | 1.3 | 1.5 |  |

|              |                                         |         |     |     |     |     |
|--------------|-----------------------------------------|---------|-----|-----|-----|-----|
| 1370184_At   | Cofilin 1, Non-Muscle                   | Cfl1    | 1.5 | 1.3 | 1.6 | 1.5 |
| 1370376_A_At | Cold Shock Domain Protein A             | Csda    | 2   | 1.9 | 2.4 | 2.7 |
|              | Complement Component 1, Q               |         |     |     |     |     |
| 1373025_At   | Subcomponent, Gamma Polypeptide         | C1qg    | 1   | 1.3 | 1   | 1   |
| 1367631_At   | Connective Tissue Growth Factor         | Ctgf    | 3.8 | 4.6 | 4.7 | 5.1 |
| 1384816_At   | Coxsackie Virus And Adenovirus Receptor | Cxadr   | 1.7 | 1.8 | 1.7 | 1.1 |
| 1370026_At   | Crystallin, Alpha B                     | Cryab   | 4.5 | 3.5 | 4.3 | 3.6 |
| 1376051_At   | Crystallin, Lamda 1                     | Cryl1   | 3.2 | 3   | 2.7 | 2.3 |
| 1379582_A_At | Cyclin A2                               | Ccna2   | 3.3 | 2.6 | 3.2 | 3.2 |
| 1371150_At   | Cyclin D1                               | Ccnd1   | 1.7 | 2.3 | 2.7 | 1.8 |
| 1367764_At   | Cyclin G1                               | Ccng1   | 1.4 | 2.1 | 1.6 | 1.1 |
|              | Cytochrome P450, Family 2, Subfamily C, |         |     |     |     |     |
| 1368155_At   | Polypeptide 40                          | Cyp2c40 | 4.7 | 4.7 | 4.5 | 4.7 |
| 1370956_At   | Decorin                                 | Dcn     | 1.7 | 2.5 | 2.3 | 3.4 |
| 1369660_At   | Defensin Beta 1                         | Defb1   | 3.4 | 2.8 | 3.7 | 1.9 |
| 1368007_At   | Deleted In Malignant Brain Tumors 1     | Dmbt1   | 4.4 | 4.9 | 3.5 | 5.5 |
| 1389553_At   | Dendritic Cell Inhibitory Receptor 3    | Dcir3   | 1.6 | 1.7 | 1.4 | 1.6 |
| 1371694_At   | Dihydropyrimidinase-Like 2              | Dpysl2  | 1.3 | 1.5 | 2.1 | 1.5 |
| 1367722_At   | Dipeptidylpeptidase 7                   | Dpp7    | 1.1 | 1.4 | 1.3 | 1.6 |
| 1368202_A_At | Disabled Homolog 2 (Drosophila)         | Dab2    | 1.6 | 1.5 | 2.7 | 1.8 |
| 1368025_At   | Dna-Damage-Inducible Transcript 4       | Ddit4   | 1.6 | 1.9 | 2.4 | 3.5 |
| 1368013_At   | Dna-Damage-Inducible Transcript 4-Like  | Ddit4l  | 3.5 | 3.2 | 3.2 | 2.6 |

## Down Syndrome Critical Region Gene

|                                    |                                         |         |     |     |     |     |
|------------------------------------|-----------------------------------------|---------|-----|-----|-----|-----|
| 1389066_At                         | 1-Like 1                                | Dscr111 | 3.5 | 3.3 | 4.3 | 2.2 |
| 1368321_At                         | Early Growth Response 1                 | Egr1    | 2.2 | 2.7 | 2.2 | 3.6 |
| 1388666_At                         | Ectodermal-Neural Cortex 1              | Enc1    | 1.7 | 2.1 | 1.9 | 2   |
| Ectonucleoside Triphosphate        |                                         |         |     |     |     |     |
| 1382434_At                         | Diphosphohydrolase 5                    | Entpd5  | 1.7 | 1.4 | 2.5 | 1   |
| Ectonucleotide                     |                                         |         |     |     |     |     |
| 1370047_At                         | Pyrophosphatase/Phosphodiesterase 1     | Enpp1   | 1.2 | 1.3 | 2.2 | 1.7 |
| 1368174_At                         | Egl Nine Homolog 3 (C. Elegans)         | Egln3   | 1.2 | 1.5 | 1.6 | 2.9 |
| 1387146_A_At                       | Endothelin Receptor Type B              | Ednrb   | 1.9 | 1.8 | 1.4 | 2.5 |
| 1375855_At                         | Ependymin Related Protein 2 (Zebrafish) | Epr2    | 1.9 | 2   | 3   | 1.8 |
| 1371527_At                         | Epithelial Membrane Protein 1           | Emp1    | 3.6 | 4.1 | 4.1 | 4.6 |
| 1387669_A_At                       | Epoxide Hydrolase 1, Microsomal         | Ephx1   | 1.4 | 1.2 | 1.2 | 1   |
| 1370295_At                         | Expressed In Non-Metastatic Cells 1     | Nme1    | 1.6 | 1.1 | 1   | 1.1 |
| Family With Sequence Similarity 3, |                                         |         |     |     |     |     |
| 1393412_At                         | Member C                                | Fam3c   | 1.2 | 1.5 | 1.5 | 1.8 |
| 1367654_At                         | Fat Tumor Suppressor Homolog            | Fath    | 2.1 | 2.1 | 2.6 | 1.4 |
| 1368271_A_At                       | Fatty Acid Binding Protein 4, Adipocyte | Fabp4   | 4.6 | 5.4 | 5   | 5.5 |
| 1370281_At                         | Fatty Acid Binding Protein 5, Epidermal | Fabp5   | 3.9 | 3.2 | 4.2 | 4.6 |
| 1398246_S_At                       | Fc Receptor, Igg, Low Affinity Iii      | Fcgr3   | 2.1 | 2.2 | 1.9 | 2   |
| 1372653_At                         | Fk506 Binding Protein 11                | Fkbp11  | 1.2 | 2.1 | 1   | 1.5 |
| 1368074_At                         | Galactose-4-Epimerase, Udp              | Gale    | 3.5 | 4.3 | 2.7 | 3.4 |

|              |                                       |       |     |     |     |     |
|--------------|---------------------------------------|-------|-----|-----|-----|-----|
| 1368374_A_At | Gamma-Glutamyltransferase 1           | Ggt1  | 1.5 | 1.8 | 1.7 | 1.5 |
|              | Gap Junction Membrane Channel Protein |       |     |     |     |     |
| 1372002_At   | Alpha 1                               | Gja1  | 1.3 | 1.8 | 1   | 1.7 |
|              | Gap Junction Membrane Channel Protein |       |     |     |     |     |
| 1373386_At   | Beta 2                                | Gjb2  | 1.7 | 2.4 | 1.2 | 1.5 |
|              | Glucose-6-Phosphate Dehydrogenase     |       |     |     |     |     |
| 1367856_At   | X-Linked                              | G6pdx | 4.4 | 3.7 | 4.8 | 4.1 |
|              | Glutamate-Ammonia Ligase (Glutamine   |       |     |     |     |     |
| 1389426_At   | Synthase)                             | Glul  | 2.6 | 3   | 3.5 | 2   |
|              | Glutamate-Cysteine Ligase, Catalytic  |       |     |     |     |     |
| 1370688_At   | Subunit                               | Gclc  | 2.1 | 1.5 | 3   | 1.8 |
| 1374070_At   | Glutathione Peroxidase 2              | Gpx2  | 7   | 6.7 | 7   | 7.2 |
| 1369926_At   | Glutathione Peroxidase 3              | Gpx3  | 2.2 | 2.1 | 2.1 | 2.2 |
| 1369061_At   | Glutathione Reductase                 | Gsr   | 3   | 2.5 | 4.9 | 3   |
| 1371089_At   | Glutathione S-Transferase Yc2 Subunit | Yc2   | 3.2 | 3.4 | 3   | 2.9 |
| 1370813_At   | Glutathione S-Transferase, Mu 5       | Gstm5 | 1.5 | 1.8 | 1.5 | 1.9 |
| 1370365_At   | Glutathione Synthetase                | Gss   | 1.2 | 1.7 | 1.6 | 1.6 |
| 1388122_At   | Glutathione-S-Transferase, Pi 1       | Gstp1 | 4.4 | 4.3 | 4.2 | 4.5 |
| 1368187_At   | Glycoprotein (Transmembrane) Nmb      | Gpnmb | 2.4 | 2.9 | 3.2 | 3.4 |
| 1383047_At   | Growth Arrest Specific 6              | Gas6  | 1.7 | 1.7 | 2   | 1.9 |
| 1375335_At   | Heat Shock 90kda Protein 1, Beta      | Hspcb | 1.3 | 1.3 | 2.3 | 1.9 |
| 1388850_At   | Heat Shock Protein 1, Alpha           | Hspca | 1.5 | 1.7 | 1.5 | 1.5 |

## Hematological And Neurological Expressed

|                                            |                                      |           |     |     |     |     |
|--------------------------------------------|--------------------------------------|-----------|-----|-----|-----|-----|
| 1371336_At                                 | Sequence 1                           | Hn1       | 1.7 | 1.7 | 1.9 | 1.7 |
| 1368533_At                                 | Hephaestin                           | Heph      | 4.2 | 3.7 | 5.3 | 4.1 |
| 1367676_At                                 | High Mobility Group Box 2            | Hmgb2     | 1.9 | 1.5 | 1.9 | 2   |
| 1393050_At                                 | Hypothetical Loc302495               | Loc302495 | 1.2 | 1.2 | 2   | 1.2 |
| 1383422_At                                 | Hypothetical Loc362564               | Loc362564 | 4.5 | 3.9 | 4.3 | 3.7 |
| 1373088_At                                 | Hypothetical Protein Loc682888       | Loc682888 | 2.7 | 3   | 2.2 | 1.9 |
| Insulin-Like Growth Factor Binding Protein |                                      |           |     |     |     |     |
| 1368160_At                                 | 1                                    | Igfbp1    | 1.5 | 2.1 | 1.6 | 3   |
| Insulin-Like Growth Factor Binding Protein |                                      |           |     |     |     |     |
| 1367652_At                                 | 3                                    | Igfbp3    | 1.9 | 1.8 | 2.3 | 1.9 |
| Insulin-Like Growth Factor Binding Protein |                                      |           |     |     |     |     |
| 1371357_At                                 | 7                                    | Igfbp7    | 2.3 | 2.2 | 1.9 | 2.2 |
| 1371334_At                                 | Integral Membrane Protein 2c         | Itm2c     | 1.1 | 1.3 | 1   | 1.3 |
| 1383240_At                                 | Integrin, Alpha 6                    | Itga6     | 1.4 | 1.7 | 1.9 | 1.8 |
| 1369956_At                                 | Interferon Gamma Receptor 1          | Ifngr1    | 1   | 1.1 | 1   | 1.1 |
| 1390507_At                                 | Interferon Stimulated Exonuclease 20 | Isg20     | 1.3 | 1.4 | 1   | 1.2 |
| 1388433_At                                 | Keratin Complex 1, Acidic, Gene 19   | Krt1-19   | 2.2 | 2.5 | 3.5 | 3.5 |
| 1371530_At                                 | Keratin Complex 2, Basic, Gene 8     | Krt2-8    | 1.1 | 1.4 | 1.1 | 1.8 |
| 1376193_At                                 | Kohjirin                             | Chrdl1    | 4.6 | 5.1 | 5.7 | 4.9 |
| 1370218_At                                 | Lactate Dehydrogenase B              | Ldhb      | 2.2 | 2.2 | 2.1 | 2.9 |
| 1371322_At                                 | Laminin, Gamma 1                     | Lamc1     | 1.2 | 1.5 | 1.8 | 1.7 |

| Latent Transforming Growth Factor Beta |                                         |          |     |     |     |     |  |
|----------------------------------------|-----------------------------------------|----------|-----|-----|-----|-----|--|
| 1367912_At                             | Binding Protein 1                       | Ltbp1    | 2.2 | 2.2 | 1.6 | 1.8 |  |
| 1386879_At                             | Lectin, Galactose Binding, Soluble 3    | Lgals3   | 1.9 | 1.8 | 2.5 | 2.8 |  |
| 1368278_At                             | Lectin, Galactoside-Binding, Soluble 2  | Lgals2   | 2.7 | 3   | 1.5 | 2.8 |  |
|                                        | Lectin, Galactoside-Binding, Soluble, 3 |          |     |     |     |     |  |
| 1387946_At                             | Binding Protein                         | Lgals3bp | 1.7 | 1.9 | 1.7 | 1.5 |  |
| 1368430_At                             | Legumain                                | Lgmn     | 1.7 | 1.8 | 1.9 | 1.7 |  |
| 1382932_At                             | Leucine Rich Repeat Containing 50       | Lrrc50   | 4.1 | 4.1 | 4.2 | 3.5 |  |
| 1388102_At                             | Leukotriene B4 12-Hydroxydehydrogenase  | Ltb4dh   | 2.2 | 2.3 | 2.4 | 1.7 |  |
| 1370928_At                             | Lps-Induced Tn Factor                   | Litaf    | 1.5 | 1.5 | 1.6 | 1.7 |  |
|                                        | Major Histocompatibility Complex, Class |          |     |     |     |     |  |
| 1370904_At                             | Ii, Dm Alpha                            | Hla-Dma  | 1.8 | 1.6 | 1.5 | 1.9 |  |
| 1367925_At                             | Major Vault Protein                     | Mvp      | 1   | 1.1 | 1.2 | 1.2 |  |
| 1370870_At                             | Malic Enzyme 1                          | Me1      | 1.9 | 1.8 | 2.7 | 1.6 |  |
| 1367568_A_At                           | Matrix Gla Protein                      | Mgp      | 3.1 | 3.5 | 3   | 3.5 |  |
| 1388152_At                             | Microtubule-Associated Protein 2        | Mtap2    | 4.6 | 5.3 | 6.3 | 5   |  |
|                                        | Microtubule-Associated Protein, Rp/Eb   |          |     |     |     |     |  |
| 1373397_At                             | Family, Member 1                        | Mapre1   | 1.1 | 1.1 | 1.2 | 1.3 |  |
|                                        | Myelocytomatosis Viral Oncogene         |          |     |     |     |     |  |
| 1368308_At                             | Homolog (Avian)                         | Myc      | 2   | 2   | 1.8 | 2.5 |  |
| 1374770_At                             | N-Acylsphingosine Amidohydrolase 1      | Asah1    | 1.1 | 1.8 | 1.5 | 1.8 |  |
| 1387599_A_At                           | Nad(P)H Dehydrogenase, Quinone 1        | Nqo1     | 2.3 | 2.2 | 2.4 | 2.3 |  |



|              |                                           |         |     |     |     |     |  |  |
|--------------|-------------------------------------------|---------|-----|-----|-----|-----|--|--|
|              | Nerve Growth Factor Receptor (Tnfrsf16)   |         |     |     |     |     |  |  |
| 1369948_At   | Associated Protein 1                      | Ngfrap1 | 4.3 | 4.2 | 4.3 | 3.3 |  |  |
|              | Neural Proliferation, Differentiation And |         |     |     |     |     |  |  |
| 1372773_At   | Control, 1                                | Npdc1   | 2.5 | 2.3 | 2.1 | 2.4 |  |  |
| 1372953_At   | Neurocalcin Delta                         | Ncald   | 1.5 | 1.4 | 1.4 | 1.6 |  |  |
| 1367845_At   | Neurofilament 3, Medium                   | Nef3    | 5.3 | 3.4 | 4.9 | 3.9 |  |  |
| 1371518_At   | Nidogen 1                                 | Nid1    | 1.9 | 2.1 | 2.3 | 1.7 |  |  |
|              | Nima (Never In Mitosis Gene A)-Related    |         |     |     |     |     |  |  |
| 1374565_At   | Expressed Kinase 6                        | Nek6    | 1.5 | 1.6 | 1.9 | 1.7 |  |  |
|              | Ns5a (Hepatitis C Virus) Transactivated   |         |     |     |     |     |  |  |
| 1388340_At   | Protein 9                                 | Ns5atp9 | 2.3 | 1.7 | 1.9 | 2.3 |  |  |
|              | Nucleolar Protein 3 (Apoptosis Repressor  |         |     |     |     |     |  |  |
| 1368544_A_At | With Card Domain)                         | Nol3    | 2.5 | 2.6 | 2.3 | 2.2 |  |  |
| 1383633_At   | Oxysterol Binding Protein-Like 1a         | Osbp11a | 1.3 | 1.7 | 1.5 | 1.2 |  |  |
| 1367946_At   | Pdz And Lim Domain 1 (Elfin)              | Pdlim1  | 1.8 | 1.3 | 1.6 | 1.6 |  |  |
| 1372294_At   | Pe Responsive Protein C64                 | Perc64  | 1   | 1.2 | 1.6 | 1.1 |  |  |
|              | Phosphogluconate Dehydrogenase            |         |     |     |     |     |  |  |
| 1371646_At   | (Mapped)                                  | Pgd     | 2.2 | 1.8 | 2.7 | 1.6 |  |  |
| 1369029_At   | Phospholipid Scramblase 1                 | Plscr1  | 2.3 | 2.6 | 2.7 | 3   |  |  |
| 1371455_At   | Phosphomannomutase 1                      | Pmm1    | 1.4 | 1.6 | 1.2 | 1.6 |  |  |
| 1372665_At   | Phosphoserine Aminotransferase 1          | Psat1   | 3.5 | 2.8 | 4   | 4.9 |  |  |
| 1377662_At   | Pirin                                     | Pir     | 1.5 | 1.4 | 1.8 | 1.4 |  |  |

| Platelet Derived Growth Factor Receptor,  |                                         |         |     |     |     |     |  |
|-------------------------------------------|-----------------------------------------|---------|-----|-----|-----|-----|--|
| 1370642_S_At                              | Beta Polypeptide                        | Pdgfrb  | 3.1 | 2.3 | 2.5 | 2.2 |  |
| 1390839_At                                | Pq Loop Repeat Containing 3             | Pqlc3   | 3.5 | 3.7 | 3.9 | 3.1 |  |
| 1370156_At                                | Prion Protein                           | Prnp    | 2.4 | 3.1 | 3.1 | 2.7 |  |
| 1388116_At                                | Procollagen, Type 1, Alpha 1            | Colla1  | 3.2 | 3.3 | 4.7 | 3.2 |  |
| 1370155_At                                | Procollagen, Type I, Alpha 2            | Colla2  | 2.2 | 2.6 | 3.3 | 2.2 |  |
| 1370959_At                                | Procollagen, Type Iii, Alpha 1          | Col3a1  | 2.2 | 1.9 | 2.5 | 1.5 |  |
| 1372439_At                                | Procollagen, Type Iv, Alpha 1           | Col4a1  | 1.9 | 1.5 | 2.8 | 1.9 |  |
| 1370895_At                                | Procollagen, Type V, Alpha 2            | Col5a2  | 1.3 | 1.3 | 2   | 1.5 |  |
| Procollagen-Proline, 2-Oxoglutarate       |                                         |         |     |     |     |     |  |
| 4-Dioxygenase (Proline 4-Hydroxylase),    |                                         |         |     |     |     |     |  |
| 1370954_At                                | Alpha 1 Polypeptide                     | P4ha1   | 1   | 1   | 1.3 | 1.6 |  |
| 1373152_At                                | Protease, Serine, 23                    | Prss23  | 1   | 1.5 | 1.1 | 1.2 |  |
| 1367691_At                                | Protein Kinase C, Delta Binding Protein | Prkcdbp | 2.3 | 2.2 | 2.2 | 2.1 |  |
| Protein Kinase Inhibitor Beta, Camp       |                                         |         |     |     |     |     |  |
| 1369105_A_At                              | Dependent, Catalytic                    | Pkib    | 1.5 | 1.6 | 1.1 | 1.9 |  |
| Protein Phosphatase 2 (Formerly 2a),      |                                         |         |     |     |     |     |  |
| 1398790_At                                | Catalytic Subunit, Alpha Isoform        | Ppp2ca  | 1.2 | 1.4 | 1.1 | 1   |  |
| 1388393_At                                | Proteolipid Protein 2                   | Plp2    | 1.2 | 1.2 | 1.3 | 1.6 |  |
| Purinergic Receptor P2x, Ligand-Gated Ion |                                         |         |     |     |     |     |  |
| 1369674_At                                | Channel, 5                              | P2rx5   | 3.7 | 3.9 | 4.1 | 3.4 |  |
| 1367590_At                                | Ran, Member Ras Oncogene Family         | Ran     | 1.1 | 1.2 | 1   | 1.3 |  |

|              |                                          |          |     |     |     |     |
|--------------|------------------------------------------|----------|-----|-----|-----|-----|
| 1369958_At   | Ras Homolog Gene Family, Member B        | Rhob     | 1.5 | 1.7 | 1.8 | 2.6 |
| 1368144_At   | Regulator Of G-Protein Signaling 2       | Rgs2     | 1.2 | 1.9 | 2   | 3.7 |
| 1368888_A_At | Reticulon 4                              | Rtn4     | 1.8 | 2.1 | 2.3 | 1.9 |
| 1371724_At   | Rex2, Rna Exonuclease 2 Homolog          | Rexo2    | 1.5 | 1.6 | 1.6 | 1.1 |
| 1392590_At   | Rho Gtpase Activating Protein 24         | Arhgap24 | 1.4 | 1.4 | 1.2 | 1.6 |
| 1389408_At   | Ribonucleotide Reductase M2              | Rrm2     | 4.1 | 4.2 | 4.2 | 4.2 |
| 1371209_At   | Rt1 Class I, Ce5                         | Rt1-Ce5  | 3.7 | 4   | 3.8 | 1.9 |
| 1377334_At   | Rt1 Class Ii, Locus Ba                   | Rt1-Ba   | 2.9 | 3.2 | 2.8 | 3.1 |
| 1371065_At   | Rt1 Class Ii, Locus Bb                   | Rt1-Bb   | 2.3 | 3   | 2.4 | 2.7 |
| 1370883_At   | Rt1 Class Ii, Locus Da                   | Rt1-Da   | 2.4 | 2.8 | 2.7 | 2.6 |
| 1370383_S_At | Rt1 Class Ii, Locus Db1                  | Rt1-Db1  | 1.8 | 2.3 | 2.1 | 2.1 |
|              | S100 Calcium Binding Protein A10         |          |     |     |     |     |
| 1386890_At   | (Calpactin)                              | S100a10  | 3.8 | 4.2 | 4   | 4   |
|              | S100 Calcium Binding Protein A11         |          |     |     |     |     |
| 1375170_At   | (Calizzarin)                             | S100a11  | 2.5 | 2.7 | 2.7 | 3.1 |
|              | S100 Calcium Binding Protein A6          |          |     |     |     |     |
| 1367661_At   | (Calcyclin)                              | S100a6   | 2.7 | 3.5 | 3.6 | 4.2 |
|              | S100 Calcium Binding Protein A8          |          |     |     |     |     |
| 1368494_At   | (Calgranulin A)                          | S100a8   | 2   | 2.2 | 2.6 | 3.8 |
|              | S100 Calcium Binding Protein A9          |          |     |     |     |     |
| 1387125_At   | (Calgranulin B)                          | S100a9   | 4.1 | 4.3 | 4.7 | 5.5 |
| 1377691_At   | Sec22 Vesicle Trafficking Protein-Like 1 | Sec2211  | 1.6 | 1.9 | 2   | 1.6 |

|              |                                                                                             |         |     |     |     |     |
|--------------|---------------------------------------------------------------------------------------------|---------|-----|-----|-----|-----|
| 1367562_At   | Secreted Acidic Cysteine Rich Glycoprotein                                                  | Sparc   | 1.6 | 1.1 | 1.5 | 1.4 |
| 1367581_A_At | Secreted Phosphoprotein 1                                                                   | Spp1    | 2.1 | 1.8 | 2.9 | 2.7 |
| 1386981_At   | Solute Carrier Family 16 (Monocarboxylic Acid Transporters), Member 1                       | Slc16a1 | 1   | 1.2 | 1   | 1   |
| 1378301_At   | Solute Carrier Family 16 (Monocarboxylic Acid Transporters), Member 6                       | Slc16a6 | 2.7 | 2.6 | 2.2 | 2.7 |
| 1387188_At   | Solute Carrier Family 17 (Sodium Phosphate), Member 1                                       | Slc17a1 | 2.2 | 1.8 | 2.3 | 1.4 |
| 1390591_At   | Solute Carrier Family 17 (Sodium Phosphate), Member 3                                       | Slc17a3 | 3.2 | 3   | 3.1 | 2.6 |
| 1370314_At   | Solute Carrier Family 20 (Phosphate Transporter), Member 1                                  | Slc20a1 | 1.4 | 1.8 | 2.3 | 2.3 |
| 1388112_At   | Solute Carrier Family 25 (Mitochondrial Carrier; Adenine Nucleotide Translocator), Member 4 | Slc25a4 | 3.2 | 3.7 | 2.9 | 3.8 |
| 1387130_At   | Solute Carrier Family 39 (Iron-Regulated Transporter), Member 1                             | Slc40a1 | 1.6 | 1.7 | 2.1 | 1.6 |
| 1383585_S_At | Sorting Nexin 10                                                                            | Snx10   | 3.2 | 4.9 | 4.3 | 3.6 |
| 1368643_At   | Spermatogenesis Associated 6                                                                | Spata6  | 1.7 | 1.3 | 1.4 | 1.6 |
| 1375889_At   | Spermine Synthase                                                                           | Sms     | 1.5 | 2   | 1.6 | 1.4 |
| 1367668_A_At | Stearoyl-Coenzyme A Desaturase 2                                                            | Scd2    | 3.4 | 2.7 | 4.6 | 5.2 |
| 1374976_A_At | Sterol O-Acyltransferase 1                                                                  | Soat1   | 1   | 1.8 | 2.3 | 2.5 |

|            |                                                 |         |     |     |     |     |
|------------|-------------------------------------------------|---------|-----|-----|-----|-----|
| 1372510_At | Sulfiredoxin 1 Homolog ( <i>S. Cerevisiae</i> ) | Srxn1   | 5.8 | 5.7 | 5.6 | 6.1 |
| 1398762_At | Syndecan Binding Protein                        | Sdcbp   | 1.2 | 1.3 | 1.5 | 1.4 |
|            | Tax1 (Human T-Cell Leukemia Virus Type          |         |     |     |     |     |
| 1388392_At | I) Binding Protein 3                            | Tax1bp3 | 2.1 | 2.1 | 2.1 | 1.8 |
| 1371361_At | Tensin                                          | Tns     | 1.4 | 1.6 | 1.5 | 1.7 |
| 1398325_At | Tetraspanin 3                                   | Tspan3  | 1.9 | 2.3 | 2.6 | 2.4 |
| 1368052_At | Tetraspanin 8                                   | Tspan8  | 2.4 | 3.2 | 1.7 | 3.5 |
| 1373421_At | Tg Interacting Factor                           | Tgif    | 1.5 | 1.9 | 1.2 | 1.6 |
| 1386958_At | Thioredoxin Reductase 1                         | Txnrd1  | 1.8 | 1.7 | 3.2 | 2.1 |
| 1374529_At | Thrombospondin 1                                | Thbs1   | 1.9 | 2.6 | 3.4 | 3   |
| 1367655_At | Thymosin, Beta 10                               | Tmsb10  | 2.7 | 2.6 | 2.2 | 3.2 |
| 1369940_At | Transaldolase 1                                 | Taldo1  | 2.2 | 2.3 | 2.2 | 1.9 |
| 1388750_At | Transferrin Receptor                            | Tfrc    | 1.9 | 1.5 | 2   | 3   |
| 1388335_At | Transgelin 2                                    | Tagln2  | 1.7 | 2.1 | 2.2 | 1.9 |
| 1386859_At | Transketolase                                   | Tkt     | 2.1 | 1.9 | 2.7 | 1.9 |
|            | Transmembrane Bax Inhibitor Motif               |         |     |     |     |     |
| 1376102_At | Containing 1                                    | Tmbim1  | 2.3 | 2.3 | 2.8 | 2.8 |
|            | Transmembrane Emp24 Domain                      |         |     |     |     |     |
| 1388628_At | Containing 3                                    | Tmed3   | 1.2 | 1.7 | 1.2 | 1.3 |
| 1379419_At | Transmembrane Protein 34                        | Tmem34  | 2.2 | 2.2 | 2.2 | 2.3 |
| 1383375_At | Transmembrane Protein 55a                       | Tmem55a | 1.6 | 1.9 | 1.6 | 1   |
| 1370694_At | Tribbles Homolog 3 ( <i>Drosophila</i> )        | Trib3   | 1.1 | 2   | 1.1 | 2.2 |

|              |                                          |           |     |     |     |     |
|--------------|------------------------------------------|-----------|-----|-----|-----|-----|
| 1371786_At   | Tripartite Motif Protein 35              | Trim35    | 1.3 | 1.5 | 1.7 | 1.5 |
| 1372639_At   | Tripartite Motif-Containing 54           | Trim54    | 2.5 | 2.2 | 2.3 | 2.9 |
| 1398303_S_At | Tropomyosin 3, Gamma                     | Tpm3      | 1.8 | 1.4 | 1.7 | 1.8 |
| 1368838_At   | Tropomyosin 4                            | Tpm4      | 1.4 | 1.5 | 2   | 2   |
| 1367579_A_At | Tubulin, Alpha 6                         | Tuba6     | 1.7 | 1.5 | 1.6 | 1.9 |
| 1371390_At   | Tubulin, Beta 2c                         | Tubb2c    | 1.8 | 2.1 | 1.7 | 1.4 |
| 1387892_At   | Tubulin, Beta 5                          | Tubb5     | 2   | 1.9 | 2.6 | 1.8 |
| 1376100_At   | Tubulin, Beta 6                          | Tubb6     | 3.7 | 3.3 | 3.8 | 3.3 |
|              | Tumor Necrosis Factor Receptor           |           |     |     |     |     |
| 1371785_At   | Superfamily, Member 12a                  | Tnfrsf12a | 2.8 | 2.7 | 1.7 | 3.1 |
|              | Tumor-Associated Calcium Signal          |           |     |     |     |     |
| 1388199_At   | Transducer 1                             | Tacstd1   | 2.2 | 2.1 | 1.7 | 2.2 |
| 1370168_At   | Tyrosine 3-Monooxygenase                 | Ywhaq     | 1.4 | 1.4 | 1.4 | 1.4 |
|              | Udp-Gal:Betaglcnac Beta                  |           |     |     |     |     |
| 1398373_At   | 1,3-Galactosyltransferase, Polypeptide 3 | B3galt3   | 2.7 | 4.2 | 4.2 | 3.5 |
|              | Udp-Gal:Betaglcnac Beta                  |           |     |     |     |     |
| 1387206_At   | 1,4-Galactosyltransferase, Polypeptide 6 | B4galt6   | 1.3 | 1.2 | 1.6 | 1   |
|              | Udp-Glucose Ceramide                     |           |     |     |     |     |
| 1368953_At   | Glucosyltransferase-Like 1               | Ugcgl1    | 1.9 | 1.3 | 2.1 | 1.7 |
| 1367938_At   | Udp-Glucose Dehydrogenase                | Ugdh      | 1.9 | 1.7 | 2.2 | 1.6 |
| 1370615_At   | Udp-Glucuronosyltransferase              | Loc286989 | 7.7 | 7.3 | 7.9 | 6.3 |
| 1370875_At   | Villin 2                                 | Vil2      | 2.4 | 2.6 | 3   | 3   |

|            |                                            |           |     |     |     |     |
|------------|--------------------------------------------|-----------|-----|-----|-----|-----|
| 1367574_At | Vimentin                                   | Vim       | 1.8 | 2   | 2.7 | 2.7 |
| 1389520_At | Wd Repeat Domain 1                         | Wdr1      | 1   | 1   | 1.6 | 1.2 |
| 1370828_At | Zinc Finger, Dhhc Domain Containing 2      | Zdhhc2    | 2.3 | 2.2 | 3   | 1.8 |
| 1368152_At | Zinc Finger, Dhhc Domain Containing 7      | Zdhhc7    | 1.2 | 1.3 | 1.5 | 1.5 |
|            | Serine (Or Cysteine) Peptidase Inhibitor,  |           |     |     |     |     |
| 1375003_At | Clade B, Member 6a                         | Serpinb6a | 1   | 1.6 | 1.4 | 1.5 |
|            | Serine (Or Cysteine) Proteinase Inhibitor, |           |     |     |     |     |
| 1377034_At | Clade B, Member 1a                         | Serpinb1a | 6   | 5.4 | 5.8 | 5   |
|            | Serine (Or Cysteine) Proteinase Inhibitor, |           |     |     |     |     |
| 1380346_At | Clade B, Member 1a                         | Serpinb1a | 5.2 | 4.2 | 4.8 | 3.6 |
| 1383290_At | Serine Peptidase Inhibitor, Kunitz Type 1  | Spint1    | 2   | 2.2 | 2.3 | 2.3 |

Genes is inferred and predicted (51)

Translocation locus (39)

Unknown completely (13)

|              |                                             |        |      |      |      |      |
|--------------|---------------------------------------------|--------|------|------|------|------|
| 1371152_A_At | 2',5'-Oligoadenylate Synthetase 1, 40/46kda | Oas1   | -1.3 | -1.3 | -1.9 | -1.2 |
|              | 3-Hydroxy-3-Methylglutaryl-Coenzyme A       |        |      |      |      |      |
| 1367932_At   | Synthase 1                                  | Hmgcs1 | -2.2 | -2.8 | -2.3 | -2.8 |
| 1368794_At   | 3-Hydroxyanthranilate 3,4-Dioxygenase       | Hao    | -1.4 | -1.4 | -2   | -1.4 |
| 1368387_At   | 3-Hydroxybutyrate Dehydrogenase, Type 1     | Bdh1   | -1.2 | -1.2 | -1.8 | -2.6 |
| 1368091_At   | 5-Oxoprolinase (Atp-Hydrolysing)            | Oplah  | -1   | -1.4 | -1.4 | -1.7 |
|              | Acyl-Coa Synthetase Long-Chain Family       |        |      |      |      |      |
| 1388153_At   | Member 1                                    | Acs11  | -1.8 | -1.3 | -2.3 | -1.8 |

|              |                                           |           |      |      |      |      |  |  |
|--------------|-------------------------------------------|-----------|------|------|------|------|--|--|
|              | Acyl-Coa Synthetase Long-Chain Family     |           |      |      |      |      |  |  |
| 1386926_At   | Member 5                                  | Acsl5     | -1.1 | -1.1 | -1.6 | -1.4 |  |  |
|              | Acyl-Coenzyme A Binding Domain            |           |      |      |      |      |  |  |
| 1373253_At   | Containing 4                              | Acbd4     | -1.2 | -1.2 | -1.8 | -1.6 |  |  |
|              | Acyl-Coenzyme A Oxidase 2, Branched       |           |      |      |      |      |  |  |
| 1371137_At   | Chain                                     | Acox2     | -1.2 | -1.2 | -1.9 | -1.4 |  |  |
| 1371824_At   | Adenylate Kinase 3-Like 1                 | Ak3l1     | -2.3 | -2.5 | -2.8 | -1.8 |  |  |
| 1368574_At   | Adrenergic Receptor, Alpha 1b             | Adra1b    | -1   | -1.8 | -1.3 | -2   |  |  |
| 1371266_At   | Afamin                                    | Afm       | -2   | -2.2 | -2.8 | -2.3 |  |  |
|              | Alcohol Dehydrogenase 4 (Class Ii), Pi    |           |      |      |      |      |  |  |
| 1369863_At   | Polypeptide                               | Adh4      | -2   | -2   | -1.9 | -2.7 |  |  |
|              | Alcohol Dehydrogenase 7 (Class Iv), Mu    |           |      |      |      |      |  |  |
| 1369072_At   | Or Sigma Polypeptide                      | Adh7      | -1.1 | -1.2 | -2.4 | -2.5 |  |  |
| 1389548_At   | Alcohol dehydrogenase, iron containing, 1 | Adhfe1    | -1.8 | -1.7 | -2.6 | -1.8 |  |  |
| 1387234_At   | Alpha-2-Glycoprotein 1, Zinc              | Azgp1     | -1.2 | -1.7 | -3.1 | -1.5 |  |  |
| 1370425_At   | Alpha-2u Globulin Pgcl3                   | Loc259244 | -9.7 | -9.8 | -9.8 | -8.8 |  |  |
| 1387985_A_At | Alpha-2u Globulin Pgcl4                   | Obp3      | -9.2 | -7.8 | -8.9 | -7.1 |  |  |
| 1388031_X_At | Alpha-2u Globulin Pgcl5                   | Loc259245 | -7.9 | -7.5 | -7.9 | -10  |  |  |
| 1367775_At   | Alpha-Methylacyl-Coa Racemase             | Amacr     | -2.3 | -1.9 | -3.3 | -2.6 |  |  |
| 1367720_At   | Aminolevulinate, Delta-, Dehydratase      | Alad      | -1.8 | -1.6 | -2.1 | -2.4 |  |  |
| 1370359_At   | Amylase 1, Salivary                       | Amy1      | -1.2 | -2.3 | -2.3 | -1.7 |  |  |
| 1390326_At   | Angiogenin, Ribonuclease A Family,        | Ang1      | -1.5 | -1.8 | -2.6 | -1.9 |  |  |



| Member 1                                |                                      |         |      |      |      |      |
|-----------------------------------------|--------------------------------------|---------|------|------|------|------|
| 1388450_At                              | Ap1 Gamma Subunit Binding Protein 1  | Ap1gbp1 | -1.8 | -1.2 | -2.2 | -1.2 |
| 1369727_At                              | Apolipoprotein A-II                  | Apoa2   | -1.4 | -1.5 | -1.9 | -1.4 |
| 1393139_At                              | Apolipoprotein C-II                  | Apoc2   | -1.4 | -1   | -2.8 | -1.2 |
| 1386980_At                              | Apolipoprotein M                     | Apom    | -1.5 | -1.6 | -2.8 | -1.6 |
| 1368621_At                              | Aquaporin 9                          | Aqp9    | -1.6 | -1   | -2.2 | -1.3 |
| 1369664_At                              | Arginine Vasopressin Receptor 1a     | Avpr1a  | -2.5 | -3.5 | -3   | -1.9 |
| 1374871_At                              | Asparaginase Like 1                  | Asrgl1  | -1.8 | -1.2 | -1.6 | -1.5 |
| 1389785_At                              | Aspartoacylase (Aminoacylase) 3      | Acy3    | -1.8 | -1.1 | -1.9 | -1.7 |
| Atp-Binding Cassette, Sub-Family B      |                                      |         |      |      |      |      |
| 1368769_At                              | (Mdr/Tap), Member 11                 | Abcb11  | -1.3 | -1.5 | -1.7 | -1.4 |
| Atp-Binding Cassette, Sub-Family C      |                                      |         |      |      |      |      |
| 1368452_At                              | (Cftr/Mrp), Member 6                 | Abcc6   | -1.4 | -1.6 | -1.9 | -1.7 |
| 1388038_At                              | Attractin                            | Atrn    | -1.1 | -1.4 | -1.2 | -1.7 |
| Bile Acid-Coenzyme A: Amino Acid        |                                      |         |      |      |      |      |
| 1387508_At                              | N-Acyltransferase                    | Baat    | -1.2 | -1.8 | -1.7 | -2.1 |
| 1371833_At                              | Brain Protein I3                     | Bri3    | -1   | -1   | -1.1 | -1.1 |
| 1387336_At                              | Camello-Like 4                       | Cml4    | -4.6 | -4.6 | -3.9 | -3.6 |
| 1367896_At                              | Carbonic Anhydrase 3                 | Ca3     | -5.5 | -6.9 | -5.9 | -6.7 |
| 1387609_At                              | Carbonic Anhydrase 5a, Mitochondrial | Ca5a    | -1.5 | -1.8 | -3.7 | -3.1 |
| Ccaat/Enhancer Binding Protein (C/Ebp), |                                      |         |      |      |      |      |
| 1384127_At                              | Alpha                                | Cebpa   | -1.8 | -1.4 | -1.1 | -1.8 |

|              |                                          |         |      |      |      |      |
|--------------|------------------------------------------|---------|------|------|------|------|
| 1377869_At   | Ccr4 Carbon Catabolite Repression 4-Like | Ccrn4l  | -1.4 | -1.1 | -1.1 | -1.4 |
| 1368418_A_At | Ceruloplasmin                            | Cp      | -1.1 | -1.5 | -1.2 | -1   |
| 1388583_At   | Chemokine (C-X-C Motif) Ligand 12        | Cxcl12  | -3.1 | -2.6 | -3.2 | -3.2 |
| 1369852_At   | Coagulation Factor X                     | F10     | -1.1 | -1   | -2.1 | -1   |
|              | Complement Component 1, S                |         |      |      |      |      |
| 1387893_At   | Subcomponent                             | C1s     | -1.4 | -1.3 | -1.5 | -1.2 |
|              | Complement Component 4 Binding Protein,  |         |      |      |      |      |
| 1368695_At   | Beta                                     | C4bpb   | -1.5 | -1.7 | -2.4 | -1.2 |
| 1383425_At   | Complement Component 5                   | C5      | -1.7 | -1.6 | -2.4 | -1.3 |
| 1384580_At   | Complement Component 6                   | C6      | -2.2 | -2.8 | -2.6 | -1.8 |
| 1370676_At   | Complement Component Factor H            | Cfh     | -1.4 | -1.7 | -1.9 | -1.4 |
| 1382678_At   | Complement Component Factor H-Like 1     | Cfh1l   | -1.8 | -1.2 | -2.3 | -1.6 |
| 1389470_At   | Complement Factor B                      | Cfb     | -1.1 | -1.1 | -1.7 | -1   |
| 1368059_At   | Crystallin, Mu                           | Crym    | -1.9 | -1.7 | -2   | -2.2 |
| 1387178_A_At | Cystathionine Beta Synthase              | Cbs     | -1.3 | -1.8 | -2   | -1.2 |
| 1370495_S_At | Cytochrome P450 2c13                     | Cyp2c13 | -2   | -3.8 | -3.1 | -2.4 |
| 1398307_At   | Cytochrome P450, 3a18                    | Cyp3a18 | -3   | -3.8 | -3.9 | -3   |
|              | Cytochrome P450, Family 1, Subfamily A,  |         |      |      |      |      |
| 1387243_At   | Polypeptide 2                            | Cyp1a2  | -3.8 | -4.6 | -5.1 | -4.1 |
|              | Cytochrome P450, Family 2, Subfamily B,  |         |      |      |      |      |
| 1371076_At   | Polypeptide 15                           | Cyp2b15 | -1.6 | 1.7  | -2.6 | -3.2 |
| 1370241_At   | Cytochrome P450, Family 2, Subfamily C,  | Cyp2c7  | -2.9 | -3   | -4.4 | -1.5 |

|            |                                         |         |      |      |      |      |  |
|------------|-----------------------------------------|---------|------|------|------|------|--|
|            | Polypeptide 7                           |         |      |      |      |      |  |
|            | Cytochrome P450, Family 2, Subfamily D, |         |      |      |      |      |  |
| 1370496_At | Polypeptide 13                          | Cyp2d13 | -1.9 | -1.8 | -3.2 | -3.6 |  |
|            | Cytochrome P450, Family 2, Subfamily D, |         |      |      |      |      |  |
| 1367917_At | Polypeptide 26                          | Cyp2d26 | -1.4 | -1.3 | -2.2 | -1.8 |  |
|            | Cytochrome P450, Family 2, Subfamily D, |         |      |      |      |      |  |
| 1370377_At | Polypeptide 9                           | Cyp2d10 | -1.4 | -1.1 | -1.7 | -1.7 |  |
|            | Cytochrome P450, Family 2, Subfamily E, |         |      |      |      |      |  |
| 1367871_At | Polypeptide 1                           | Cyp2e1  | -1.3 | -1.4 | -3.7 | -1.1 |  |
|            | Cytochrome P450, Family 3, Subfamily A, |         |      |      |      |      |  |
| 1387118_At | Polypeptide 1                           | Cyp3a1  | -4.2 | -5.1 | -6   | -3.6 |  |
|            | Cytochrome P450, Family 3, Subfamily A, |         |      |      |      |      |  |
| 1370593_At | Polypeptide 11                          | Cyp3a11 | -5.1 | -6.4 | -6.7 | -6.7 |  |
|            | Cytochrome P450, Family 3, Subfamily A, |         |      |      |      |      |  |
| 1370387_At | Polypeptide 13                          | Cyp3a13 | -4   | -4.1 | -5.1 | -2.4 |  |
|            | Cytochrome P450, Family 4, Subfamily F, |         |      |      |      |      |  |
| 1368467_At | Polypeptide 2                           | Cyp4f2  | -1.3 | -1.7 | -1.4 | -1.7 |  |
|            | Cytochrome P450, Family 4, Subfamily F, |         |      |      |      |      |  |
| 1387973_At | Polypeptide 4                           | Cyp4f4  | -1.4 | -1.5 | -2.4 | -1.5 |  |
|            | Cytochrome P450, Family 7, Subfamily A, |         |      |      |      |      |  |
| 1368458_At | Polypeptide 1                           | Cyp7a1  | -2.4 | -3.3 | -2.8 | -3.3 |  |
| 1369424_At | Cytochrome P450, Subfamily 2a,          | Cyp2a2  | -2.8 | -3   | -3.8 | -2.9 |  |

| Polypeptide 1                                           |                                         |        |      |      |      |      |
|---------------------------------------------------------|-----------------------------------------|--------|------|------|------|------|
| 1367979_S_At                                            | Cytochrome P450, Subfamily 51           | Cyp51  | -1.6 | -2.4 | -1.5 | -2.8 |
| 1387328_At                                              | Cytochrome P450, Subfamily Iic          | Cyp2c  | -5.7 | -6.1 | -5.9 | -5.9 |
| 1387874_At                                              | D Site Albumin Promoter Binding Protein | Dbp    | -4.3 | -3.4 | -3.3 | -3.8 |
| Dehydrogenase/Reductase (Sdr Family)                    |                                         |        |      |      |      |      |
| 1397205_At                                              | Member 7                                | Dhrs7  | -6   | -5.8 | -5.6 | -7.5 |
| 1387284_At                                              | Dihydropyrimidinase                     | Dpys   | -1.4 | -1.7 | -2.3 | -2.1 |
| 1367994_At                                              | Dihydropyrimidine Dehydrogenase         | Dpyd   | -1.6 | -1.5 | -1.6 | -1.3 |
| 1370936_At                                              | Dimethylglycine Dehydrogenase Precursor | Dmgdh  | -1.1 | -1.4 | -1.6 | -1.3 |
| Ectonucleotide                                          |                                         |        |      |      |      |      |
| 1368536_At                                              | Pyrophosphatase/Phosphodiesterase 2     | Enpp2  | -2.3 | -2.6 | -3.2 | -3.1 |
| 1387819_At                                              | Elastase 1, Pancreatic                  | Ela1   | -3.5 | -2   | -4.1 | -2.9 |
| Enoyl-Coenzyme A,<br>Hydratase/3-Hydroxyacyl Coenzyme A |                                         |        |      |      |      |      |
| 1368283_At                                              | Dehydrogenase                           | Ehhadh | -2.3 | -1.1 | -2.6 | -2.8 |
| 1368325_At                                              | Epidermal Growth Factor                 | Egf    | -1.2 | -1.7 | -1.4 | -1.4 |
| 1370830_At                                              | Epidermal Growth Factor Receptor        | Egfr   | -1.7 | -2.4 | -1.4 | -1.7 |
| 1367667_At                                              | Farnesyl Diphosphate Synthase           | Fdps   | -1.3 | -1.7 | -1.8 | -1.6 |
| Farnesyl Diphosphate Farnesyl Transferase               |                                         |        |      |      |      |      |
| 1389906_At                                              | 1                                       | Fdft1  | -1.7 | -1.4 | -1   | -1.2 |
| Farnesyl Diphosphate Farnesyl Transferase               |                                         |        |      |      |      |      |
| 1367839_At                                              | 1                                       | Fdft1  | -1.4 | -2   | -1.6 | -2.3 |

|              |                                        |       |      |      |      |      |
|--------------|----------------------------------------|-------|------|------|------|------|
| 1368717_At   | Fatty Acid Amide Hydrolase             | Faah  | -1.3 | -1.2 | -1   | -1.5 |
| 1369111_At   | Fatty Acid Binding Protein 1, Liver    | Fabp1 | -1.4 | -1.3 | -2.1 | -2.3 |
| 1368453_At   | Fatty Acid Desaturase 2                | Fads2 | -1.4 | -2.1 | -2.2 | -3.2 |
| 1387053_At   | Flavin Containing Monooxygenase 1      | Fmo1  | -1.6 | -1.9 | -1.6 | -1.8 |
|              | Fumarylacetoacetate Hydrolase Domain   |       |      |      |      |      |
| 1372676_At   | Containing 1                           | Fahd1 | -1.7 | -1.3 | -2.2 | -1.3 |
|              | Fxyd Domain-Containing Ion Transport   |       |      |      |      |      |
| 1369960_At   | Regulator 1                            | Fxyd1 | -1.2 | -1.1 | -1.6 | -1.6 |
| 1388395_At   | G0/G1 Switch Gene 2                    | G0s2  | -2.2 | -1.8 | -3.1 | -2.2 |
| 1368117_At   | Gephyrin                               | Gphn  | -1.3 | -1.3 | -1.3 | -1.5 |
|              | Glucosaminyl (N-Acetyl) Transferase 2, |       |      |      |      |      |
| 1374903_At   | I-Branching Enzyme                     | Gcnt2 | -2   | -2.1 | -1.6 | -1.5 |
| 1387023_At   | Glutathione S-Transferase, Mu Type 3   | Gstm3 | -2.3 | -2.4 | -2.7 | -2.8 |
| 1387672_At   | Glycine N-Methyltransferase            | Gnmt  | -1.9 | -2   | -4   | -2   |
| 1380905_At   | Glycine-N-Acyltransferase              | Glyat | -1.6 | -1.5 | -1.7 | -2.3 |
| 1368328_At   | Glycogen Synthase 2                    | Gys2  | -1.9 | -1.1 | -2.3 | -1.5 |
|              | Glycosylphosphatidylinositol Specific  |       |      |      |      |      |
| 1380833_At   | Phospholipase D1                       | Gpld1 | -1.9 | -2   | -2.2 | -2   |
| 1373803_A_At | Growth Hormone Receptor                | Ghr   | -1.3 | -1.4 | -1.6 | -1.7 |
|              | Hairy And Enhancer Of Split 6          |       |      |      |      |      |
| 1374625_At   | (Drosophila)                           | Hes6  | -2.1 | -2.4 | -2.6 | -3.3 |
| 1391485_At   | Hepatocyte Nuclear Factor 4, Alpha     | Hnf4a | -1.5 | -2   | -2.8 | -2.2 |

|              |                                           |           |      |      |      |      |
|--------------|-------------------------------------------|-----------|------|------|------|------|
| 1387307_At   | Histidine Ammonia Lyase                   | Hal       | -1.7 | -1.2 | -2.4 | -1.3 |
| 1370202_At   | Hras Like Suppressor 3                    | Hrasl3    | -1.7 | -1.4 | -2.1 | -1.3 |
| 1394112_At   | Hydroxyacid Oxidase 1                     | Hao1      | -1.3 | -1.3 | -1.5 | -2.1 |
| 1387139_At   | Hydroxyacid Oxidase 2 (Long Chain)        | Hao2      | -4   | -4.1 | -4.4 | -4.6 |
| 1369986_At   | Hydroxyacyl Glutathione Hydrolase         | Hagh      | -1.1 | -1.3 | -1.4 | -1.7 |
| 1387156_At   | Hydroxysteroid (17-Beta) Dehydrogenase 2  | Hsd17b2   | -3.4 | -3.1 | -3.1 | -4   |
| 1376496_At   | Hypothetical Protein Loc503164            | Loc503164 | -3.9 | -1.3 | -1.5 | -1.7 |
| 1398634_At   | Hypothetical Protein Loc678836            | Loc678836 | -1.3 | -1.5 | -2.2 | -2.1 |
| 1383692_At   | Hypothetical Protein Loc681037            | Loc681037 | -1.8 | -1.4 | -2.2 | -1.3 |
| 1369238_At   | Inhibin Beta E                            | Inhbe     | -1.6 | -1.1 | -2.1 | -1.8 |
| 1394022_At   | Inhibitor Of Dna Binding 4                | Id4       | -1.9 | -1.6 | -2.4 | -2.6 |
| 1382599_At   | Insulin-Like Growth Factor 1              | Igf1      | -2.2 | -2.2 | -2.5 | -1.1 |
|              | Insulin-Like Growth Factor Binding        |           |      |      |      |      |
| 1387816_At   | Protein, Acid Labile Subunit              | Igfals    | -3.4 | -2.1 | -1.9 | -4.4 |
| 1369450_At   | Integral Membrane Transport Protein Ust5r | Ust5r     | -4.3 | -4.7 | -4.7 | -4.7 |
| 1368134_A_At | Interleukin 4 Receptor, Alpha             | Il4ra     | -3.5 | -2.7 | -1.6 | -2.9 |
| 1368878_At   | Isopentenyl-Diphosphate Delta Isomerase   | Idi1      | -1.4 | -2.5 | -1.8 | -2.1 |
| 1370232_At   | Isovaleryl Coenzyme A Dehydrogenase       | Ivd       | -1.1 | -1.3 | -1.5 | -1.8 |
| 1387323_At   | Kallikrein B, Plasma 1                    | Klkb1     | -2   | -1.9 | -2.2 | -1.1 |
| 1387375_At   | Ketohexokinase                            | Khk       | -1.1 | -1.3 | -1.3 | -1.8 |
| 1367948_A_At | Kinase Insert Domain Protein Receptor     | Kdr       | -1.6 | -1.1 | -1.2 | -2.2 |
| 1368915_At   | Kynurenine 3-Monooxygenase (Kynurenine    | Kmo       | -1.7 | -2.2 | -2   | -2.9 |

|              |                                          |           |      |      |      |      |  |
|--------------|------------------------------------------|-----------|------|------|------|------|--|
|              | 3-Hydroxylase)                           |           |      |      |      |      |  |
| 1374006_At   | Kynurenine Aminotransferase Iii          | Kat3      | -1.4 | -1.5 | -2   | -1.7 |  |
| 1367887_At   | Lecithin Cholesterol Acyltransferase     | Lcat      | -1.3 | -1.2 | -2.2 | -1.5 |  |
| 1369837_At   | L-Gulonolactone Oxidase                  | Gulo      | -1.4 | -1.5 | -2.1 | -1.5 |  |
| 1370108_A_At | Lin-7 Homolog A (C. Elegans)             | Lin7a     | -3.1 | -2.9 | -3.4 | -1.5 |  |
| 1369701_At   | Lipase, Hepatic                          | Lipc      | -1.4 | -1.7 | -1.9 | -3.1 |  |
| 1371715_At   | Loc500651                                | Mgc112883 | -1.6 | -1.4 | -2   | -1.5 |  |
|              | Low Density Lipoprotein Receptor-Related |           |      |      |      |      |  |
| 1388416_At   | Protein 1                                | Lrp1      | -1.2 | -1.1 | -1.4 | -1.1 |  |
| 1387528_At   | Mannose Binding Lectin 2 (Protein C)     | Mbl2      | -1.2 | -1.6 | -1.6 | -1.3 |  |
| 1398296_At   | Membrane Interacting Protein Of Rgs16    | Mir16     | -2.4 | -1.6 | -3.2 | -1   |  |
| 1368422_At   | Mesenchyme Homeobox 2                    | Meox2     | -1.7 | -1.5 | -1.9 | -1.5 |  |
| 1371479_At   | Methyltransferase Like 7a                | Mettl7a   | -1.2 | -1.1 | -1.9 | -1.2 |  |
|              | Moco Sulphurase C-Terminal Domain        |           |      |      |      |      |  |
| 1376847_At   | Containing-Like                          | Loc690745 | -1.9 | -1.5 | -2.2 | -3.1 |  |
|              | Moco Sulphurase C-Terminal Domain        |           |      |      |      |      |  |
| 1383796_At   | Containing-Like                          | Loc690745 | -1.8 | -1.5 | -1.9 | -2.8 |  |
| 1387283_At   | Myxovirus (Influenza Virus) Resistance 2 | Mx2       | -1.8 | -1.7 | -1.7 | -1.3 |  |
| 1368543_At   | Nadph Oxidase 4                          | Nox4      | -4.3 | -3.8 | -3.4 | -3   |  |
| 1371412_A_At | Neuronal Regeneration Related Protein    | Nrep      | -2.8 | -2.6 | -2   | -2.2 |  |
| 1372438_At   | Nitrilase Family, Member 2               | Nit2      | -1.3 | -1.3 | -2.1 | -1.6 |  |
| 1387121_A_At | N-Myc Downstream Regulated Gene 2        | Ndrp2     | -1.5 | -1.5 | -1.8 | -1.6 |  |

|              |                                                                            |         |      |      |      |      |
|--------------|----------------------------------------------------------------------------|---------|------|------|------|------|
| 1369679_A_At | Nuclear Factor I/A                                                         | Nfia    | -1.5 | -1.3 | -3   | -1.7 |
| 1389601_At   | Nuclear Factor I/B                                                         | Nfib    | -1.6 | -1.2 | -1.8 | -1.1 |
| 1368376_At   | Nuclear Receptor Subfamily 0, Group B,<br>Member 2                         | Nr0b2   | -1.7 | -2.5 | -1.5 | -1.7 |
| 1370541_At   | Nuclear Receptor Subfamily 1, Group D,<br>Member 2                         | Nr1d2   | -2.6 | -2   | -1.5 | -1.4 |
| 1387981_At   | Olfactory Receptor 59                                                      | Olr59   | -1.9 | -3.3 | -5.3 | -5.4 |
| 1367729_At   | Ornithine Aminotransferase                                                 | Oat     | -2.4 | -2.4 | -3   | -1.2 |
| 1375205_At   | P300/Cbp-Associated Factor                                                 | Pcaf    | -1.5 | -1.6 | -1.4 | -1.4 |
| 1368303_At   | Period Homolog 2 (Drosophila)                                              | Per2    | -1.2 | -1.8 | -1.6 | -1   |
| 1367885_At   | Peroxisomal Membrane Protein 2                                             | Pxmp2   | -1.2 | -1.1 | -1.9 | -1.8 |
| 1386990_At   | Phenylalkylamine Ca <sup>2+</sup> Antagonist<br>(Emopamil) Binding Protein | Ebp     | -1.3 | -1.4 | -1.8 | -1.9 |
| 1369581_At   | Phosphatidylethanolamine<br>N-Methyltransferase                            | Pemt    | -1.2 | -1.3 | -2.3 | -1.3 |
| 1368399_A_At | Plasma Glutamate Carboxypeptidase                                          | Pgcp    | -1.3 | -1.2 | -1.6 | -1.7 |
| 1370334_At   | Pleckstrin Homology Domain Containing,<br>Family B (Evectins) Member 1     | Plekhb1 | -1.1 | -1.4 | -1.2 | -1.7 |
| 1388459_At   | Procollagen, Type Xviii, Alpha 1                                           | Col18a1 | -1.2 | -1.3 | -1.6 | -1   |
| 1385640_At   | Proprotein Convertase Subtilisin/Kexin<br>Type 9                           | Pcsk9   | -1.3 | -2.3 | -1.2 | -1.4 |
| 1380389_At   | Prostaglandin E Receptor 3 (Subtype Ep3)                                   | Ptger3  | -1.8 | -2.6 | -2.4 | -2.3 |



|            |                                            |           |      |      |      |      |
|------------|--------------------------------------------|-----------|------|------|------|------|
| 1369286_At | Protein C                                  | Proc      | -1   | -1.1 | -1.5 | -1.3 |
|            | Protein Phosphatase 1, Regulatory          |           |      |      |      |      |
| 1384262_At | (Inhibitor) Subunit 3b                     | Ppp1r3b   | -2.2 | -3.2 | -2   | -2.3 |
|            | Protein Tyrosine Phosphatase, Receptor     |           |      |      |      |      |
| 1387901_At | Type, D                                    | Ptprd     | -1.8 | -1.8 | -1.7 | -1.5 |
| 1368627_At | Regucalcin                                 | Rgn       | -1.4 | -2.3 | -2.5 | -1.9 |
| 1388185_At | Retinoblastoma 1                           | Rb1       | -1.6 | -1.8 | -2   | -1.5 |
|            | Retinoic Acid Receptor Responder           |           |      |      |      |      |
| 1371691_At | (Tazarotene Induced) 2                     | Rarres2   | -1.3 | -1.4 | -2.1 | -1.5 |
| 1387240_At | Retinol Dehydrogenase 7                    | Rdh7      | -1.8 | -1.4 | -3.2 | -1.5 |
| 1368943_At | Ribonuclease, Rnase A Family 4             | Rnase4    | -1.4 | -2   | -2.6 | -1.3 |
| 1373452_At | Rna Terminal Phosphate Cyclase-Like 1      | Rcl1      | -1.1 | -1.1 | -2   | -1.3 |
| 1388164_At | Rt1 Class Ib, Locus S3                     | Rt1-S3    | -1.5 | -1.2 | -1.4 | -1.1 |
| 1374308_At | Sec14-Like 2 (S. Cerevisiae)               | Sec14l2   | -2   | -1.9 | -2.8 | -2   |
| 1391032_At | Seizure Related 6 Homolog (Mouse)          | Sez6      | -2   | -3.8 | -1.7 | -4.6 |
|            | Serine (Or Cysteine) Peptidase Inhibitor,  |           |      |      |      |      |
|            | Clade A (Alpha-1 Antipeptidase,            |           |      |      |      |      |
| 1371143_At | Antitrypsin), Member 7                     | Serpina7  | -1.9 | -1.1 | -2.5 | -1.9 |
|            | Serine (Or Cysteine) Peptidase Inhibitor,  |           |      |      |      |      |
| 1368048_At | Clade A, Member 3k                         | Serpina3k | -1.7 | -1.9 | -2.8 | -2.8 |
|            | Serine (Or Cysteine) Proteinase Inhibitor, |           |      |      |      |      |
| 1370836_At | Clade A (Alpha-1 Antiproteinase,           | Serpina4  | -1.7 | -1.9 | -2.4 | -2.2 |

|            |                                            |           |      |      |      |      |  |
|------------|--------------------------------------------|-----------|------|------|------|------|--|
|            | Antitrypsin), Member 4                     |           |      |      |      |      |  |
|            | Serine (Or Cysteine) Proteinase Inhibitor, |           |      |      |      |      |  |
| 1371147_At | Clade A, Member 3m                         | Serpina3m | -2.2 | -2.3 | -3.3 | -1.8 |  |
| 1371083_At | Serine Protease Inhibitor                  | Loc299282 | -2.3 | -2.8 | -3.6 | -3.2 |  |
| 1368446_At | Serine Protease Inhibitor, Kazal Type 1    | Spink1    | -2.9 | -3.7 | -4.4 | -2.4 |  |
| 1387967_At | Serine Protease Inhibitor, Kazal Type 3    | Spink3    | -2.2 | -2.2 | -3   | -2   |  |
|            | Signal Transducer And Activator Of         |           |      |      |      |      |  |
| 1373670_At | Transcription 2                            | Stat2     | -1.1 | -2.1 | -3.2 | -3   |  |
|            | Single Immunoglobulin And                  |           |      |      |      |      |  |
| 1378605_At | Toll-Interleukin 1 Receptor (Tir) Domain   | Sigirr    | -1.1 | -1.1 | -1.2 | -1.2 |  |
|            | Solute Carrier Family 10 (Sodium/Bile      |           |      |      |      |      |  |
| 1368609_At | Acid Cotransporter Family), Member 1       | Slc10a1   | -2.2 | -2.8 | -3.5 | -2.2 |  |
|            | Solute Carrier Family 19 (Thiamine         |           |      |      |      |      |  |
| 1390863_At | Transporter), Member 2                     | Slc19a2   | -2   | -1.7 | -2.3 | -2.3 |  |
| 1368460_At | Solute Carrier Family 2, Member 5          | Slc2a5    | -1.5 | -1.4 | -1.1 | -1.8 |  |
|            | Solute Carrier Family 22 (Organic Anion    |           |      |      |      |      |  |
| 1368461_At | Transporter), Member 8                     | Slc22a8   | -1.8 | -2   | -2.3 | -2.3 |  |
|            | Solute Carrier Family 25 (Mitochondrial    |           |      |      |      |      |  |
|            | Carrier; Dicarboxylate Transporter),       |           |      |      |      |      |  |
| 1370020_At | Member 10                                  | Slc25a10  | -1.3 | -1.3 | -1.9 | -1.4 |  |
|            | Solute Carrier Family 27 (Fatty Acid       |           |      |      |      |      |  |
| 1387325_At | Transporter), Member 5                     | Slc27a5   | -2.4 | -2.4 | -3.5 | -1.4 |  |

|              |                                           |         |      |      |      |      |  |  |
|--------------|-------------------------------------------|---------|------|------|------|------|--|--|
|              | Solute Carrier Family 37                  |         |      |      |      |      |  |  |
|              | (Glycerol-6-Phosphate Transporter),       |         |      |      |      |      |  |  |
| 1386960_At   | Member 4                                  | Slc37a4 | -1.6 | -1.6 | -1.8 | -1.3 |  |  |
|              | Solute Carrier Family 6 (Neurotransmitter |         |      |      |      |      |  |  |
| 1387372_At   | Transporter, Gaba), Member 13             | Slc6a13 | -1.3 | -2   | -2.1 | -1   |  |  |
|              | Solute Carrier Organic Anion Transporter  |         |      |      |      |      |  |  |
| 1387567_At   | Family, Member 1a1                        | Slco1a1 | -1.6 | -2.1 | -3   | -2.3 |  |  |
|              | Solute Carrier Organic Anion Transporter  |         |      |      |      |      |  |  |
| 1387093_At   | Family, Member 1a4                        | Slco1a4 | -3.2 | -3.7 | -3.8 | -2.7 |  |  |
|              | Solute Carrier Organic Anion Transporter  |         |      |      |      |      |  |  |
| 1369746_A_At | Family, Member 1b2                        | Slco1b2 | -2.2 | -2.8 | -2.9 | -2.4 |  |  |
|              | Sortilin-Related Receptor, Ldlr Class A   |         |      |      |      |      |  |  |
| 1377457_A_At | Repeats-Containing                        | Sor11   | -3.1 | -1.7 | -1.7 | -1.8 |  |  |
|              | Sparc-Related Modular Calcium Binding     |         |      |      |      |      |  |  |
| 1388545_At   | Protein 1                                 | Smoc1   | -1.4 | -1.2 | -1.3 | -1.3 |  |  |
| 1373874_At   | Sphingosine-1-Phosphate Phosphatase 1     | Sgpp1   | -1.3 | -1.1 | -1.1 | -1.1 |  |  |
| 1387017_At   | Squalene Epoxidase                        | Sqle    | -1.9 | -2.5 | -1.7 | -1.6 |  |  |
| 1369465_At   | Steroid Delta-Isomerase, 3 Beta           | Hsd3b   | -2.4 | -2.9 | -3.2 | -2.1 |  |  |
| 1368275_At   | Sterol-C4-Methyl Oxidase-Like             | Sc4mol  | -2.1 | -2.7 | -2.3 | -2.9 |  |  |
|              | Sterol-C5-Desaturase (Fungal Erg3,        |         |      |      |      |      |  |  |
| 1387926_At   | Delta-5-Desaturase) Homolog               | Sc5d    | -1.2 | -1.4 | -1.6 | -1.7 |  |  |
| 1369296_At   | Sulfotransferase Family, Cytosolic, 1c,   | Sult1c1 | -3.8 | -3.1 | -4   | -4.7 |  |  |

| Member 1                                |                                          |          |      |      |      |      |
|-----------------------------------------|------------------------------------------|----------|------|------|------|------|
| Sulfotransferase Family, Cytosolic, 1c, |                                          |          |      |      |      |      |
| 1369531_At                              | Member 2                                 | Sult1c2  | -1.3 | -2.3 | -2.4 | -2.8 |
| Sulfotransferase Family, Cytosolic, 1c, |                                          |          |      |      |      |      |
| 1370943_At                              | Member 2a                                | Sult1c2a | -2.7 | -2.8 | -5   | -2.2 |
| 1368733_At                              | Sulfotransferase, Estrogen Preferring    | Ste      | -3.9 | -5.4 | -5.5 | -4.9 |
| 1370098_At                              | Synaptobrevin-Like 1                     | Sybl1    | -1.3 | -1.4 | -1.9 | -1.6 |
| 1370166_At                              | Syndecan 2                               | Sdc2     | -1.2 | -1.3 | -1.4 | -1.5 |
| 1387852_At                              | Thyroid Hormone Responsive Protein       | Thrsp    | -1.7 | -3   | -1.5 | -2.1 |
| 1370150_A_At                            | Thyroid Hormone Responsive Protein       | Thrsp    | -1.6 | -3.3 | -1.5 | -1.8 |
| 1385374_At                              | Thyrotroph Embryonic Factor              | Tef      | -2.4 | -2.6 | -2   | -1.3 |
| 1369435_At                              | Tocopherol (Alpha) Transfer Protein      | Ttpa     | -1.3 | -1.5 | -1.7 | -1.7 |
| 1371913_At                              | Transforming Growth Factor, Beta Induced | Tgfb1    | -1.7 | -1.6 | -1.6 | -2.1 |
| 1389725_At                              | Transmembrane 7 Superfamily Member 2     | Tm7sf2   | -1.3 | -1.7 | -2.1 | -2   |
| 1387703_A_At                            | Ubiquitin Specific Peptidase 2           | Usp2     | -2.9 | -3   | -3   | -1.2 |
| 1374890_At                              | Ubiquitin-Conjugating Enzyme E2d 2       | Ube2d2   | -1.1 | -1.1 | -1.3 | -1.2 |
| 1389738_At                              | Uracil-Dna Glycosylase                   | Ung      | -1.3 | -1   | -1.6 | -1   |
| 1368245_At                              | Ureidopropionase, Beta                   | Upb1     | -1   | -1.6 | -1.7 | -1.6 |
| 1389270_X_At                            | Urinary Protein 2                        | Rup2     | -1   | -1.6 | -1.6 | -1.5 |
| 1383695_At                              | Vasoactive Intestinal Peptide Receptor 1 | Vipr1    | -1.1 | -1   | -1.2 | -2.1 |
| 1390857_At                              | Xylulokinase Homolog (H. Influenzae)     | Xylb     | -1.2 | -1.3 | -1.8 | -2   |
| 1368877_At                              | Zinc Finger Protein 354a                 | Zfp354a  | -2.2 | -2   | -2   | -1.7 |

Genes are inferred or predicted (63)

Transcribed Locus (48)

Unknown genes completely (19)

---

Note: The words '12w, 14w, 16w and 20w' in the table indicate cirrhosis tissues, dysplastic nodules, early cancerous nodules and cancerous nodules with lung metastasis compared with control respectively. The signal log ratio estimates the magnitude and direction of change of a transcript when two arrays are compared (DEN-exposed versus control). The log scale used is base 2, thus, a Signal Log Ratio of 1.0 indicates an increase of the transcript level by 2 fold and -1.0 indicates a decrease by 2 fold.
